## 23 **Abstract**

24 Balanced mitochondrial fission and fusion play an important role in shaping and distributing  
25 mitochondria, as well as contributing to mitochondrial homeostasis and adaptation to stress. In  
26 particular, mitochondrial fission is required to facilitate degradation of damaged or dysfunctional units  
27 via mitophagy. Two Parkinson's disease factors, PINK1 and Parkin, are considered key mediators  
28 of damage-induced mitophagy, and promoting mitochondrial fission is sufficient to suppress the  
29 pathological phenotypes in *Pink1/parkin* mutant *Drosophila*. We sought additional factors that  
30 impinge on mitochondrial dynamics and which may also suppress *Pink1/parkin* phenotypes. We  
31 found that the *Drosophila* phosphatidylinositol 4-kinase III $\beta$  homologue, Four wheel drive (Fwd),  
32 promotes mitochondrial fission downstream of the pro-fission factor Drp1. Previously described only  
33 as male sterile, we identified several new phenotypes in *fwd* mutants, including locomotor deficits  
34 and shortened lifespan, which are accompanied by mitochondrial dysfunction. Finally, we found that  
35 *fwd* overexpression can suppress locomotor deficits and mitochondrial disruption in *Pink1/parkin*  
36 mutants, consistent with its function in promoting mitochondrial fission. Together these results shed  
37 light on the complex mechanisms of mitochondrial fission and further underscore the potential of  
38 modulating mitochondrial fission/fusion dynamics in the context of neurodegeneration.

39

## 40 **Author Summary**

41 Mitochondria are dynamic organelles that can fuse and divide, in part to facilitate turnover of  
42 damaged components. These processes are essential to maintain a healthy mitochondrial network,  
43 and, in turn, maintain cell viability. This is critically important in high-energy, post-mitotic tissues such  
44 as neurons. We previously identified *Drosophila* phosphatidylinositol-4 kinase *fwd* as a pro-fission  
45 factor in a cell-based screen. Here we show that loss of *fwd* regulates mitochondrial fission *in vivo*,  
46 and acts genetically downstream of *Drp1*. We identified new phenotypes in *fwd* mutants, similar to  
47 loss of *Pink1/parkin*, two genes linked to Parkinson's disease and key regulators of mitochondrial  
48 homeostasis. Importantly, *fwd* overexpression is able to substantially suppress locomotor and  
49 mitochondrial phenotypes in *Pink1/parkin* mutants, suggesting manipulating phosphoinositides may  
50 represent a novel route to tackling Parkinson's disease.

51

## 52 **Introduction**

53 Mitochondria are dynamic organelles that are transported to the extremities of the cell and frequently  
54 undergo fusion and fission events, which influences their size, branching and degradation. Many of  
55 the core components of the mitochondrial fission and fusion machineries have been well  
56 characterised, these include the pro-fusion factors Mfn1/2 and Opa1, and pro-fission factors Drp1  
57 and Mff (1). Maintaining an appropriate balance of fission and fusion, as well as transport dynamics,  
58 is crucial for cellular health and survival as mutations in many of the core components cause severe  
59 neurological conditions in humans and model organisms (2).

60 The mitochondrial fission/fusion cycle has been linked to the selective removal of damaged  
61 mitochondria through the process of autophagy (termed mitophagy), in which defective mitochondria  
62 are engulfed into autophagosomes and degraded by lysosomes (3, 4). Two genes that have been  
63 firmly linked to the mitophagy process are *PINK1* and *PRKN* (5-7). Mutations in these genes cause  
64 autosomal-recessive juvenile parkinsonism, associated with degeneration of midbrain dopaminergic  
65 neurons and motor impairments, among other symptoms and pathologies. Studies from a wide  
66 variety of model systems have shown various degrees of mitochondrial dysfunction associated with  
67 mutation of *PINK1/PRKN* homologues including disrupted fission/fusion (8-16). *Drosophila* have  
68 proven to be a fruitful model for investigating the function of the conserved homologues *Pink1* and  
69 *parkin*, with these mutants exhibiting robust mitochondrial disruption and neuromuscular  
70 phenotypes. Importantly, several studies have shown that the pathological consequences of loss of  
71 *Pink1* or *parkin* can be largely suppressed by genetic manipulations that increase mitochondrial  
72 fission or reduce fusion (17-23).

73 To identify genes involved in mitochondrial quality control and homeostasis, we previously  
74 performed an RNAi screen in *Drosophila* S2 cells to identify kinases and phosphatases that  
75 phenocopy or suppress hyperfused mitochondria caused by loss of *Pink1* (24). We identified the  
76 phosphatidylinositol 4-kinase III $\beta$  homologue, *four wheel drive* (*fwd*), whose knockdown  
77 phenocopied *Pink1* RNAi, resulting in excess mitochondrial fusion. *Drosophila* mutant for *fwd* have  
78 been reported to be viable but male sterile due to incomplete cytokinesis during spermatogenesis  
79 (25-28); however, no other organismal phenotypes or mitochondrial involvement have been

80 described to date. Thus, we sought to better understand the role of *Fwd* in mitochondrial  
81 homeostasis.

82 In this study, we have characterised *fwd* mutants for organismal phenotypes associated with  
83 *Pink1/parkin* dysfunction, and analysed the impact on mitochondrial form and function. We have  
84 also investigated genetic interactions between *fwd* and *Pink1/parkin*, as well as with mitochondrial  
85 fission/fusion factors. We found that loss of *fwd* inhibited mitochondrial function, causing increased  
86 mitochondrial length and branching, and decreased respiratory capacity. These effects were  
87 associated with shortened lifespan and dramatically reduced locomotor ability, similar to *Pink1* and  
88 *parkin* mutants. Furthermore, *fwd* overexpression was sufficient to significantly suppress  
89 *Pink1/parkin* mutant locomotor deficits and mitochondrial phenotypes. Interestingly, we found that  
90 the mitochondrial and locomotion phenotypes in *fwd* mutants can be rescued by loss of pro-fusion  
91 factors *Marf* and *Opa1*, but the activity of *Drp1* appears to require *fwd*. These results support a role  
92 for *fwd* in regulating mitochondrial morphology, specifically in facilitating mitochondrial fission, and  
93 further substantiate the important contribution of aberrant mitochondrial fission/fusion dynamics in  
94 *Pink1/parkin* phenotypes.

95

## 96 **Results**

### 97 **Loss of *fwd* causes mitochondrial hyperfusion along with locomotor and lifespan deficits**

98 We previously found that knockdown of *fwd* phenocopied loss of *Pink1* in cultured cells by causing  
99 mitochondrial hyperfusion (24). To extend these *in vitro* observations we sought to determine  
100 whether *fwd* has a broader role in regulating mitochondrial homeostasis *in vivo*. In striking similarity  
101 to *Pink1* mutants, mutations in *fwd* have previously been shown to cause male sterility due to  
102 aberrant spermatogenesis (25-28); however, no other organismal phenotypes have been described.

103 *Pink1* mutants have a range of additional phenotypes including deficits in negative geotaxis  
104 (climbing ability), disruption of flight muscle mitochondria, shortened lifespan, and modest  
105 degeneration of dopaminergic (DA) neurons (10, 29). Thus, we assessed these phenotypes in two  
106 *fwd* mutants – a nonsense mutation, *fwd*<sup>3</sup>, and a *P*-element insertion, *fwd*<sup>neo1</sup>. In all instances, these  
107 mutations were crossed to a deficiency (*Df(3L)7C*) to avoid potential extragenic effects from

108 homozygosity. Both mutant combinations,  $fwd^{\beta}/Df$  and  $fwd^{neo1}/Df$  (hereafter, designated simply as  
109  $fwd^{\beta}$  and  $fwd^{neo1}$ ), displayed a striking loss of climbing ability in young flies (Fig. 1A), though the  
110 phenotype was weaker in  $fwd^{neo1}$  consistent with it being a hypomorph. Notably, transgenic re-  
111 expression of  $fwd$  using a ubiquitous driver ( $da-GAL4$ ), was able to restore climbing ability to near  
112 wild-type levels (Fig. 1A), supporting the specificity of this phenotype for loss of  $fwd$ . Analysing  
113 longevity in the  $fwd^{\beta}$  null mutants, revealed a significant reduction in median lifespan (Fig. 1B).  
114 However, no significant loss of DA neurons was detected in aged  $fwd$  mutant brains (Fig. 1C). These  
115 results reveal some phenotypic similarity between *Pink1* and  $fwd$  mutants at the organismal level as  
116 well as the cellular level.

117 To investigate the relative contribution of  $fwd$  to locomotor ability in different tissues, we  
118 expressed a transgenic RNAi construct (30) via tissue-specific drivers. We first verified that  
119 ubiquitous knockdown of  $fwd$  via  $da-GAL4$  phenocopied the genetic mutants, thus, demonstrating  
120 its efficacy to recapitulate null mutant phenotypes (Fig. 1D). Interestingly, pan-neuronal knockdown,  
121 using  $nSyb-GAL4$ , reproduced the striking loss of climbing ability, whereas knockdown in all muscles  
122 via  $Mef2-GAL4$  only modestly affected climbing (Fig. 1D). Thus,  $fwd$  shows some tissue-selective  
123 requirement but plays an important role in the nervous system that was not previously appreciated.

124 Since  $fwd$  knockdown in cultured cells caused mitochondrial fusion, similar to loss of *Pink1*,  
125 we sought to further characterise the impact of  $fwd$  loss on mitochondria *in vivo*. Mitochondria are  
126 particularly abundant in adult flight muscles, and this tissue is severely affected in *Pink1/parkin*  
127 mutants (8, 10, 29), so we first analysed mitochondrial morphology in  $fwd$  mutants in this tissue.  
128 Imaging mitochondria by fluorescence or electron-microscopy in flight muscles revealed them to be  
129 grossly normal in their cristae structure, size and abundance compared to control (Fig. 2A-B).

130 We next sought to analyse the mitochondrial morphology in a tissue where the specific  
131 knockdown of  $fwd$  resulted in strong climbing defects. We analysed the network morphology in cell  
132 bodies of the larval ventral ganglion (part of the central nervous system). Expression of mitoGFP in  
133 a subset of neurons, driven by  $CCAP-GAL4$ , allowed better three-dimensional imaging of the  
134 mitochondrial network (Fig. 2C). While the overall appearance was similar between  $fwd$  mutant and  
135 control, quantitative analysis of the networks revealed that both the length and connectivity (number

136 of branches) were increased upon loss of *fwd* (Fig. 2D-F). These results are consistent with the  
137 previous cell-based study indicating loss of *fwd* causes mitochondrial hyperfusion.

138 We next assessed mitochondrial function, analysing maximal respiratory capacity in intact  
139 mitochondria and overall ATP levels in whole animals. Respiration measured by the oxygen  
140 consumption rate in energised mitochondria, stimulated via either complex I or complex II substrates,  
141 was significantly reduced in *fwd* mutants (Fig. 3A). However, the overall level of ATP was not  
142 significantly affected (Fig. 3B). These results indicate that mitochondrial respiration is affected by  
143 loss of *fwd* but compensatory mechanisms could still maintain normal steady-state ATP levels in the  
144 organism.

#### 145 146 ***fwd* mutant phenotypes are suppressed by loss of fusion factors**

147 The results above substantiate that loss of *fwd* causes excess mitochondrial fusion *in vivo*. We next  
148 addressed whether the mitochondrial hyperfusion may contribute to the locomotor deficit. To do this  
149 we combined ubiquitous expression of *fwd* RNAi with genetic manipulations that reduce fusion  
150 (partial loss of pro-fusion factors *Marf* or *Opa1*) or promote fission (overexpression of pro-fission  
151 factor *Drp1*), and assessed climbing behaviour. Heterozygous loss of either *Marf* (the fly homologue  
152 of *MFN1/2*) or *Opa1*, which did not affect climbing alone, was sufficient to significantly suppress the  
153 climbing deficit caused by *fwd* RNAi (Fig. 4A, B). However, contrary to what we expected,  
154 overexpression of *Drp1* was not able to ameliorate the climbing defect (Fig. 4C).

155 To better understand these results, we analysed the mitochondrial morphology in neuronal  
156 cell bodies of these genotypes. As with the *fwd* mutant, *fwd* RNAi caused a significant elongation of  
157 mitochondria and increased branching (Fig. 4D-F). Consistent with the effects on climbing,  
158 heterozygous loss of *Marf* or *Opa1* reverted the increase in mitochondrial length, whereas *Drp1*  
159 overexpression did not (Fig. 4D, E). Interestingly, the increased branching caused by loss of *fwd*  
160 was suppressed by heterozygous loss of *Marf* or *Drp1* overexpression, but not by heterozygous loss  
161 of *Opa1* (Fig. 4D, F). The reasons for the complex effects on branching are unclear but may reflect  
162 that *Marf* directs fusion of the OMM (and hence, coordinates branching), while *Opa1* regulates fusion  
163 of IMM. Nevertheless, the effects on mitochondrial branch length suggest that *Drp1* may require  
164 *Fwd* to execute mitochondrial fission. Overall, the genetic interaction of *Marf* and *Opa1* suppressing

165 the *fwd* RNAi-induced climbing deficit supports this phenotype being, at least partially, caused by  
166 mitochondrial hyperfusion.

167  
168 ***fwd* overexpression can suppress *Pink1/parkin* mutant phenotypes**

169 While many studies have focused on the role of PINK1/Parkin in damage-induced mitophagy,  
170 aberrant mitochondrial dynamics is clearly a major cause of *Pink1/parkin* mutant phenotypes in  
171 *Drosophila*, including locomotor deficits and flight muscle degeneration, since these can be  
172 substantially suppressed by promoting mitochondrial fission (17-20). As our results indicate that Fwd  
173 promotes mitochondrial fission, we next tested whether overexpression of *fwd* could ameliorate  
174 *Pink1* and *parkin* mutant phenotypes. Combining *Pink1/parkin* mutants with ubiquitous *fwd*  
175 overexpression was sufficient to significantly suppress the climbing deficit in both mutants (Fig. 5A,  
176 B). In addition, the thoracic indentations caused by degeneration of the underlying flight muscle were  
177 also significantly improved (Fig. 5C). Disruption of mitochondrial integrity in the flight muscles was  
178 also visibly improved when *fwd* was overexpressed in muscles (Fig. 5D). These results are  
179 consistent with Fwd overexpression promoting mitochondrial fission and partially reverting the  
180 hyperfusion caused by *Pink1/parkin* loss.

181  
182 We were intrigued by the earlier observation that heterozygous loss of *Marf* or *Opa1* could  
183 revert the aberrant mitochondrial morphology and climbing defect of *fwd* RNAi, but the  
184 overexpression of *Drp1* did not (Fig. 4). These results suggested that the activity of Drp1 might  
185 require Fwd, which we sought to test further. As a paradigm for Drp1 activity, overexpression of *Drp1*  
186 is sufficient to substantially suppress the climbing deficit and mitochondrial disruption in *Pink1* and  
187 *parkin* mutants (Fig. 6A-D), as previously reported (18). Remarkably, coincident knockdown of *fwd*  
188 completely prevented the ability of Drp1 to rescue the *Pink1/parkin* mutant phenotypes (Fig. 6A-D).  
189 These results further indicates that Drp1 requires the activity of Fwd.

190



## 191 Discussion

192 We previously identified knockdown of *fwd* to induce mitochondrial hyperfusion in cultured cells,  
193 similar to loss of *Pink1* (24). Here we have validated that genetic loss or knockdown of *fwd* also  
194 causes excess mitochondrial fusion in neuronal cells *in vivo*, leading to increased mitochondrial  
195 length and branching (Fig. 2). As mitochondrial fission/fusion dynamics have been shown to be  
196 important for proper mitochondrial homeostasis (2), it is not surprising that this also has an impact  
197 on respiration at the organismal level (Fig. 3). Furthermore, it follows that this in turn has an impact  
198 on organismal fitness and vitality (Fig. 1). While *fwd* mutants have previously been shown to be male  
199 sterile, we describe for the first time new phenotypes associated with loss of *fwd*: profound locomotor  
200 deficits and shortened lifespan. Interestingly, there is a stronger requirement for *fwd* in the nervous  
201 system compared to the musculature.

202 The robust locomotor phenotype allowed us to test the genetic relationship between *fwd* and  
203 core components of the mitochondrial fission/fusion machinery. Given the excess mitochondrial  
204 fusion in *fwd* mutants, suppression of the organismal phenotypes by reduction of fusion factors *Marf*  
205 and *Opa1* was expected. However, it was surprising that overexpression of the fission factor *Drp1*  
206 was unable to ameliorate organismal phenotypes or even the mitochondrial morphology (Fig. 4).  
207 These results suggested that *Drp1* requires *Fwd* to function. Consistent with this, *Drp1*  
208 overexpression was no longer able to rescue *Pink1/parkin* mutant phenotypes in the absence of *fwd*  
209 (Fig. 6). These genetic experiments strongly hint at a functional link between *Drp1* and *Fwd* but do  
210 not illuminate the molecular mechanism underpinning it. *Fwd*, is the *Drosophila* homologue of  
211 phosphatidylinositol 4-kinase III $\beta$  [PI(4)KB], which mediates the phosphorylation of  
212 phosphatidylinositol to generate phosphatidylinositol 4-phosphate [PI(4)P] (31). PI(4)P is one of the  
213 most abundant phosphoinositides, which is usually concentrated in the trans-Golgi network (32);  
214 thus, an obvious mechanism by which PI(4)P may influence mitochondrial dynamics is not  
215 immediately apparent. However, while this manuscript was in preparation, Nagashima and  
216 colleagues reported that Golgi-derived PI(4)P-containing vesicles were required for the final stages  
217 of mitochondrial fission (33). In that study, the authors found that loss of PI(4)KIII $\beta$  led to a  
218 hyperfused and branched mitochondrial network, consistent with what we observed here (Fig. 2).  
219 Moreover, they described that while *Drp1* was still recruited, it was unable to fully execute the



220 scission event, although the reason is unclear, leading to extended mitochondrial constriction sites.  
221 Our genetic evidence that the action of Drp1 requires Fwd is consistent with these findings, and  
222 provide an *in vivo* validation of Nagashima and colleagues' results. Further, it is interesting to note  
223 that while the study by Nagashima et al. suggests a universal role for PI(4)P in mitochondrial fission,  
224 our *in vivo* analysis revealed that while *fwd* affected mitochondrial morphology in the nervous  
225 system, it appeared to have no major impact in the musculature. These tissue-specific requirements  
226 were borne out in the strong locomotor deficits caused by neuronal loss of *fwd* but much less so by  
227 knockdown in muscles. Clearly, further work is required to better understand the complexities of  
228 regulated fission/fusion events in different cell contexts *in vivo*.

229 A key role of mitochondrial fission/fusion dynamics is in contributing to a quality control  
230 mechanism of mitochondrial sorting to eliminate dysfunctional units via mitophagy (3, 4). A  
231 substantial body of evidence from cellular models indicates that mammalian PINK1/Parkin act to  
232 promote damage-induced mitophagy (5-7), and some *in vivo* evidence from *Drosophila* also  
233 supports this (34, 35). However, the precise nature of PINK1/Parkin-mediated mitochondrial  
234 turnover *in vivo* is debated with contradictory results emerging (36-40). Nevertheless, interventions  
235 to combat the decline in mitochondrial homeostasis remain a key challenge to combatting  
236 *PINK1/PRKN* related pathologies. One mechanism that seems to provide substantial benefit in  
237 physiological contexts is through augmenting mitochondrial fission, which presumably facilitates the  
238 flux of damaged mitochondrial components towards turnover (17-20). Here, we provide further  
239 evidence that augmenting a pro-fission pathway is beneficial against *Pink1/parkin* dysfunction. As  
240 phosphoinositides can be interconverted by the action of multiple enzymes that may be druggable,  
241 these findings suggest another potential route towards a therapeutic intervention.

242

## 243 **Methods**

### 244 ***Drosophila* stocks and husbandry**

245 Flies were raised and kept under standard conditions in a temperature-controlled incubator with a  
246 12h:12h light:dark cycle at 25 °C and 65% relative humidity, on food consisting of agar, cornmeal,  
247 molasses, propionic acid and yeast. The following strains were obtained from the Bloomington  
248 *Drosophila* Stock Center (RRID:SCR\_006457): *w*<sup>1118</sup> (RRID:BDSC\_6326), *fwd*<sup>neo1</sup>  
249 (RRID:BDSC\_10069), *Df(3L)7C* (RRID:BDSC\_5837), *Opa1*<sup>s3475</sup> (RRID:BDSC\_12188), *da-GAL4*  
250 (RRID:BDSC\_55850), *nSyb-GAL4* (RRID:BDSC\_51941), *Mef2-GAL4* (RRID:BDSC\_27390),  
251 *CCAP-GAL4* (RRID:BDSC\_25685, RRID:BDSC\_25686), *UAS-mito-HA-GFP* (RRID:BDSC\_8442,  
252 RRID:BDSC\_8443), *fwd*<sup>RNAi</sup> (RRID:BDSC\_35257), *luciferase*<sup>RNAi</sup> (RRID:BDSC\_31603). Other lines  
253 were kindly provided as follows: *fwd*<sup>3</sup> from J. Brill (27), and the *Pink1*<sup>B9</sup> and *UAS-Drp1* from J. Chung  
254 (10), *Mar*<sup>B</sup> from H. Bellen (41). The *park*<sup>25</sup> mutants have been described previously (8). *UAS-GFP-*  
255 *fwd* was generated by PCR amplification of the GFP-*fwd* sequence from a *hsp83::GFP-fwd* plasmid  
256 (28), kindly provided by G. Polevoy and J. Brill, and cloned into pUAST.attB for integration at the  
257 attP40 locus (BestGene Inc.). All experiments in adult flies were conducted using males, except Fig.  
258 4A where females were used.

259

### 260 **Locomotor assays**

261 The startle induced negative geotaxis (climbing) assay was performed using a counter-current  
262 apparatus. Experiments were performed using 2-3 days old flies. Except for figure 4A, all the  
263 climbing assays used males. Briefly, 20-23 flies were placed into the first chamber, tapped to the  
264 bottom, and given 10 s to climb a 10 cm distance. This procedure was repeated five times (five  
265 chambers), and the number of flies that has remained into each chamber counted. The weighted  
266 performance of several group of flies for each genotype was normalized to the maximum possible  
267 score and expressed as *Climbing index* (8).

268

### 269 **Lifespan**

270 For lifespan experiments, flies were grown under identical conditions at low density. Progeny were  
271 collected under very light anaesthesia and kept in tubes of approximately 25 males each, and

272 transferred every 2-3 days to fresh media and the number of dead flies recorded. Percent survival  
273 was calculated at the end of the experiment after correcting for any accidental loss.

274

## 275 **Immunohistochemistry and sample preparation**

276 For immunostaining, adult flight muscles were dissected in PBS and fixed in 4% formaldehyde for  
277 30 min at RT, permeabilized in 0.3% Triton X-100 for 30 min, and blocked with 0.3% Triton X-100  
278 plus 4% Horse Serum (HS) in PBS for 1 h at RT. Tissues were incubated with ATP5A antibody  
279 (Abcam Cat# ab14748, RRID:AB\_301447; 1:500), diluted in 0.3% Triton X-100 plus 4% HS in PBS  
280 overnight at 4°C, then rinsed 3 times 10 min with 0.3% Triton X-100 in PBS, and incubated with the  
281 appropriate fluorescent secondary antibodies overnight at 4°C. The tissues were washed 2 times in  
282 PBS and mounted on slides. Adult brains were dissected in PBS and fixed on ice in 4% formaldehyde  
283 for 30 min, permeabilized in 0.3% Triton X-100 for 30 min, and blocked with 0.3% Triton X-100 plus  
284 4% HS in PBS for 4 h at RT. Incubation with Tyrosine Hydroxylase Antibody (TH) antibody  
285 (Immunostar Cat#22941, 1:200) diluted in 0.3% Triton X-100 plus 4% HS was done for 72h at 4°C.  
286 Secondary antibody was incubated for 3 h at RT. Then washes were done 3 times for 20 min with  
287 0.3% Triton X-100 in PBS and mounted in carved slides. Larvae brains were dissected on PBS and  
288 mounted sideways on slides coated with poly-lysine at 0.9 mg/ml . They were fixed in 4%  
289 formaldehyde for 20 min at RT, then washed in PBS. All the sample preparations were mounted  
290 using Prolong Diamond Antifade mounting medium (Thermo Fischer Scientific Cat# P36961).

291

## 292 **Microscopy**

293 Fluorescence imaging was conducted using a Zeiss LSM 880 confocal microscope (Carl Zeiss  
294 MicroImaging) equipped with Nikon Plan-Apochromat 100x/1.4 NA oil immersion objectives. Images  
295 were taken at a resolution of 2048x2048 pixels and they were prepared using Fiji software  
296 (RRID:SCR\_002285).

297

## 298 **Analysis of mitochondrial morphology**

299 Motoneuron cell bodies from larvae ventral nerve cord expressing *CCAP-GAL4* were used to  
300 analyse mitochondrial branches marked by mitoGFP. All images were processed using Fiji software  
301 (RRID:SCR\_002285). Z-stacks of individual neurons were cropped to a size of 232×232 pixels. The  
302 mitoGFP signal was enhanced and smoothed using two filters: unsharp mask (radius =10.0 pixels,  
303 Mask strength 0.9) and median filtering (radius =3). Then binary masks were created using “Otsu  
304 method” in auto and Dark background, and ‘skeletonized’ from the Process and Binary menu served  
305 to generate the branches. These skeletonized images were analysed using Analyse Skeleton  
306 (2D/3D). Finally, Median branch length per cell was calculated using Branch Length column from  
307 “Branch information” window, and the proportion of individual vs interconnected branches per cell  
308 was calculated by taking the “Number of branches” column from the “Results” window.

309

## 310 **Transmission electron-microscopy**

311 Thoraces were prepared from 5-day-old adult flies and treated as previously described (8). Ultra-  
312 thin sections were examined using a FEI Tecnai G2 Spirit 120KV transmission electron-microscope.

313

## 314 **Respirometry analysis**

315 Respiration was monitored at 30 °C using an Oxygraph-2k high-resolution respirometer  
316 (OROBOROS Instruments) using a chamber volume set to 2 mL. Calibration with air-saturated  
317 medium was performed daily. Data acquisition and analysis were carried out using Datlab software  
318 (OROBOROS Instruments). Five flies per genotype (equal weight) were homogenised in respiration  
319 buffer (120 mM sucrose, 50 mM KCl, 20 mM Tris-HCl, 4 mM KH<sub>2</sub>PO<sub>4</sub>, 2 mM MgCl<sub>2</sub>, and 1 mM EGTA,  
320 1 g/l fatty acid-free BSA, pH 7.2). For coupled (state 3) assays, complex I-linked respiration was  
321 measured at saturating concentrations of malate (2 mM), glutamate (10 mM) and adenosine  
322 diphosphate (ADP, 2.5 mM). Complex II-linked respiration was assayed in respiration buffer  
323 supplemented with 0.15 μM rotenone, 10 mM succinate and 2.5 mM ADP. Data from 7-8  
324 independent experiments were averaged.

325

## 326 **ATP levels**

327 The ATP assay was performed as described previously (24). Briefly, five male flies for each  
328 genotype were homogenized in 100  $\mu$ L 6 M guanidine-Tris/EDTA extraction buffer and subjected to  
329 rapid freezing in liquid nitrogen. Homogenates were diluted 1/100 with the extraction buffer and  
330 mixed with the luminescent solution (CellTiter-Glo Luminescent Cell Viability Assay, Promega).  
331 Luminescence was measured with a SpectraMax Gemini XPS luminometer (Molecular Devices).  
332 The average luminescent signal from technical triplicates was expressed relative to protein levels,  
333 quantified using the Pierce BCA Protein Assay kit (ThermoFisher Scientific). Data from 3  
334 independent experiments were averaged and the luminescence expressed as a percentage of the  
335 control.

336

## 337 **Statistical analysis**

338 Data from the various experimental assays were analysed as follows: For behavioural analyses,  
339 Kruskal-Wallis non-parametric test with Dunn's post-hoc correction for multiple comparisons was  
340 used. Lifespan was analysed by Log-rank (Mantel-Cox) test. Categorical analyses (i.e. thoracic  
341 indentations) were analysed by Chi-square test. Mitochondrial branch length by Mann-Whitney non-  
342 parametric test, and connectivity by Kruskal-Wallis with Dunn's post-hoc correction. ATP levels were  
343 analysed by unpaired *t*-test, and respiration by paired *t*-test. Analyses were performed using  
344 GraphPad Prism 8 software (RRID:SCR\_002798) and RStudio software (RRID:SCR\_000432).

345

346

## 347 **Data availability**

348 All data that support the findings of this study are available on reasonable request to the  
349 corresponding author. The contributing authors declare that all relevant data are included in the  
350 paper.

351

352

353 **Acknowledgements**

354 This work is supported by MRC core funding (MC\_UU\_00015/4, MC-A070-5PSB0 and  
355 MC\_UU\_00015/6) and ERC Starting grant (DYNAMITO; 309742). Stocks were obtained from the  
356 Bloomington *Drosophila* Stock Center which is supported by grant NIH P40OD018537. We thank J.  
357 Brill for sharing  *fwd*  stocks, Claire Pilgrim for technical assistance, and J. Prudent for sharing results  
358 prior to publication. We thank members of the Whitworth lab for fruitful discussions and feedback on  
359 the manuscript.

360

361

362 **Author Contributions**

363 A.T-F. and E.L.W. designed and performed experiments, and analysed data. A.J.W. conceived the  
364 study, designed experiments, analysed the data and supervised the work. A.J.W. wrote the  
365 manuscript with input from all authors.

366

367

368 **Declaration of interest**

369 The authors declare no competing interests.

370

371 **Figure Legends**

372 **Figure 1. Loss of *fwd* causes motor deficits and shortened lifespan.**

373 (A) Climbing assay of *fwd* mutants (*fwd*<sup>β</sup> and *fwd*<sup>neo1</sup>) in trans to a deficiency (Df), alone or with  
374 transgenic overexpression of *fwd* (*fwd* O/E) driven by *da-GAL4*. (B) Lifespan analysis of control and  
375 *fwd* mutants. Significance for lifespan was analysed by log-rank (Mantel-Cox) test. (C) Quantification  
376 of dopaminergic neurons in PPL1 cluster of 30-day-old adult brains. Chart shows mean ± SD with  
377 individual data points. Significance was analysed by Mann-Whitney test. (D) Climbing analysis of  
378 *fwd* knockdown (RNAi) in all (ubiquitous) or selected tissues. Charts show mean ± 95% confidence  
379 interval (CI); number of animals analysed is shown in each bar. Significance for climbing was  
380 analysed by Kruskal-Wallis test with Dunn's post-hoc correction for multiple comparisons.  
381 Comparison is against the control unless otherwise indicated; \*  $P < 0.05$ , \*\*\*  $P < 0.001$ , \*\*\*\*  $P < 0.0001$ ;  
382 ns, non-significant. Full genotypes are given in Supplementary Table 1.

383

384 **Figure 2. Loss of *fwd* causes excess mitochondrial fusion.**

385 (A) Confocal microscopy analysis of mitochondrial morphology, visualised using mitoGFP, in control  
386 and *fwd* mutant flight muscles. Scale bar = 10 μm. (B) Electron-microscopy analysis of mitochondrial  
387 structure in flight muscles. Scale bar = 1 μm. (C) Confocal microscopy analysis of mitochondrial  
388 network morphology (mitoGFP) in neuronal cell bodies from larval ventral ganglion of control and  
389 *fwd* mutants. Image shows a projected z-stack. Scale bar = 2 μm. (C') Skeletonised image of  
390 mitochondrial network used for quantification. (D) Quantification of median mitochondrial branch  
391 length per cell. Violin plot indicating median (thick, horizontal line) and quartiles (dashed lines).  
392 Significance was analysed by Mann-Whitney test. (E) Frequency distribution plot of mitochondrial  
393 network connectivity (number of branches) per cell. N = 46 (control) and 54 (*fwd*). (F) Chart  
394 summarising quantification of connectivity shown in E, plotting the proportion of individual  
395 mitochondria (0 branches) and connected mitochondria (1-10 branches) relative to the total number  
396 of networks per cell. Significance was analysed by Kruskal-Wallis test with Dunn's post-hoc  
397 correction for multiple comparisons. \*  $P < 0.05$ , \*\*  $P < 0.01$ . Full genotypes are given in Supplementary  
398 Table 1.



399

400 **Figure 3. Loss of *fwd* inhibits mitochondrial respiration.**

401 (A) Mitochondrial respiration analysis by oxygen consumption rate (OCR) and (B) ATP levels in  
402 control and *fwd* mutant adults. Charts show mean  $\pm$  SEM. Significance was analysed by paired (A)  
403 or unpaired (B) *t*-test. \*  $P < 0.05$ ; ns, non-significant. Full genotypes are given in Supplementary Table  
404 1.

405

406 **Figure 4. *fwd* genetically interacts with mitochondrial fission/fusion factors.**

407 (A-C) Climbing assay of *fwd* RNAi alone or in combination with heterozygous *Marf* or *Opa1* mutations  
408 or transgenic overexpression of *Drp1*. Transgenic expression was mediated via *da-GAL4*. Charts  
409 show mean  $\pm$  95% confidence interval (CI); number of animals analysed is shown in each bar. (D)  
410 Confocal microscopy analysis of mitochondrial network morphology (mitoGFP) in neuronal cell  
411 bodies from larval ventral ganglion of control, *fwd* RNAi alone and in combination with heterozygous  
412 *Marf* or *Opa1* mutations or transgenic overexpression of *Drp1*. Image shows a projected z-stack.  
413 Scale bar = 2  $\mu$ m. (D') Skeletonised image of mitochondrial network used for quantification. (E)  
414 Quantification of median mitochondrial branch length per cell. Violin plot indicating median (thick,  
415 horizontal line) and quartiles (dashed lines). Significance was analysed by Mann-Whitney test. (F)  
416 Plot of the proportion of individual mitochondria (0 branches) and connected mitochondria (1-10  
417 branches) quantified per cell. Significance was calculated by Kruskal-Wallis test with Dunn's post-  
418 hoc correction for multiple comparisons. Comparison is against the control unless otherwise  
419 indicated; \*  $P < 0.05$ , \*\*\*  $P < 0.001$ , \*\*\*\*  $P < 0.0001$ ; ns, non-significant. Full genotypes are given in  
420 Supplementary Table 1.

421

422 **Figure 5. *fwd* overexpression partially suppresses *Pink1/parkin* phenotypes.**

423 (A, B) Climbing assay of control, *Pink1* or *parkin* mutants with or without *fwd* overexpression induced  
424 by *da-GAL4*. Significance was analysed by Kruskal-Wallis test with Dunn's post-hoc correction for  
425 multiple comparisons. Comparison is against the control unless otherwise indicated; \*  $P < 0.05$ , \*\*\*  
426  $P < 0.001$ , \*\*\*\*  $P < 0.0001$ ; ns, non-significant. (C) Analysis of thoracic indentations evident in *Pink1* or  
427 *parkin* mutants in the presence of absence of *fwd* overexpression, induced by *da-GAL4*. Significance

428 was determined by Chi-squared test. \*\*\*\*  $P < 0.0001$ . (D) Confocal microscopy analysis of  
429 mitochondrial integrity, visualised by anti-ATP5A immunostaining, in flight muscles of the indicated  
430 genotypes. Transgenic expression was mediated via *Mef2-GAL4*. Scale bar = 10  $\mu\text{m}$ . Full genotypes  
431 are given in Supplementary Table 1.

432

433 **Figure 6. *Drp1* activity requires *fwd* in suppressing *Pink1/parkin* phenotypes.**

434 (A, B) Climbing assay of control, *Pink1* or *parkin* mutants with or without *Drp1* overexpression or  
435 concomitant induction of *fwd* RNAi. Significance was analysed by Kruskal-Wallis test with Dunn's  
436 post-hoc correction for multiple comparisons. Comparison is against the control unless otherwise  
437 indicated; \*\*  $P < 0.01$ , \*\*\*  $P < 0.001$ , \*\*\*\*  $P < 0.0001$ ; ns, non-significant. (C, D) Confocal microscopy  
438 analysis of mitochondrial integrity, visualised by anti-ATP5A immunostaining, in flight muscles of the  
439 indicated genotypes. For all conditions, transgenic expression was mediated via *da-GAL4*. Scale  
440 bar = 10  $\mu\text{m}$ . Full genotypes are given in Supplementary Table 1.

441

## 442 **References**

- 443 1. Tilokani L, Nagashima S, Paupe V, Prudent J. Mitochondrial dynamics: overview of  
444 molecular mechanisms. *Essays Biochem.* 2018;62(3):341-60.
- 445 2. Nunnari J, Suomalainen A. Mitochondria: in sickness and in health. *Cell.* 2012;148(6):1145-  
446 59.
- 447 3. Twig G, Hyde B, Shirihai OS. Mitochondrial fusion, fission and autophagy as a quality control  
448 axis: the bioenergetic view. *Biochim Biophys Acta.* 2008;1777(9):1092-7.
- 449 4. Twig G, Shirihai OS. The interplay between mitochondrial dynamics and mitophagy. *Antioxid*  
450 *Redox Signal.* 2011;14(10):1939-51.
- 451 5. McWilliams TG, Muqit MM. PINK1 and Parkin: emerging themes in mitochondrial  
452 homeostasis. *Curr Opin Cell Biol.* 2017;45:83-91.
- 453 6. Nguyen TN, Padman BS, Lazarou M. Deciphering the Molecular Signals of PINK1/Parkin  
454 Mitophagy. *Trends Cell Biol.* 2016;26(10):733-44.
- 455 7. Pickrell AM, Youle RJ. The roles of PINK1, parkin, and mitochondrial fidelity in Parkinson's  
456 disease. *Neuron.* 2015;85(2):257-73.
- 457 8. Greene JC, Whitworth AJ, Kuo I, Andrews LA, Feany MB, Pallanck LJ. Mitochondrial  
458 pathology and apoptotic muscle degeneration in *Drosophila* parkin mutants. *Proceedings of the*  
459 *National Academy of Sciences of the United States of America.* 2003;100(7):4078-83.
- 460 9. Palacino JJ, Sagi D, Goldberg MS, Krauss S, Motz C, Wacker M, et al. Mitochondrial  
461 dysfunction and oxidative damage in parkin-deficient mice. *The Journal of biological chemistry.*  
462 2004;279(18):18614-22.
- 463 10. Park J, Lee SB, Lee S, Kim Y, Song S, Kim S, et al. Mitochondrial dysfunction in *Drosophila*  
464 PINK1 mutants is complemented by parkin. *Nature.* 2006;441(7097):1157-61.
- 465 11. Mortiboys H, Thomas KJ, Koopman WJ, Klaffke S, Abou-Sleiman P, Olpin S, et al.  
466 Mitochondrial function and morphology are impaired in parkin-mutant fibroblasts. *Ann Neurol.*  
467 2008;64(5):555-65.
- 468 12. Exner N, Treske B, Paquet D, Holmstrom K, Schiesling C, Gispert S, et al. Loss-of-function  
469 of human PINK1 results in mitochondrial pathology and can be rescued by parkin. *J Neurosci.*  
470 2007;27(45):12413-8.

- 471 13. Gautier CA, Kitada T, Shen J. Loss of PINK1 causes mitochondrial functional defects and  
472 increased sensitivity to oxidative stress. *Proceedings of the National Academy of Sciences of the*  
473 *United States of America*. 2008;105(32):11364-9.
- 474 14. Flinn L, Mortiboys H, Volkmann K, Koster RW, Ingham PW, Bandmann O. Complex I  
475 deficiency and dopaminergic neuronal cell loss in parkin-deficient zebrafish (*Danio rerio*). *Brain*.  
476 2009;132(Pt 6):1613-23.
- 477 15. Morais VA, Verstreken P, Roethig A, Smet J, Snellinx A, Vanbrabant M, et al. Parkinson's  
478 disease mutations in PINK1 result in decreased Complex I activity and deficient synaptic function.  
479 *EMBO Mol Med*. 2009;1(2):99-111.
- 480 16. Grunewald A, Gegg ME, Taanman JW, King RH, Kock N, Klein C, et al. Differential effects  
481 of PINK1 nonsense and missense mutations on mitochondrial function and morphology. *Exp Neurol*.  
482 2009;219(1):266-73.
- 483 17. Deng H, Dodson MW, Huang H, Guo M. The Parkinson's disease genes pink1 and parkin  
484 promote mitochondrial fission and/or inhibit fusion in *Drosophila*. *Proc Natl Acad Sci USA*.  
485 2008;105(38):14503-8.
- 486 18. Poole AC, Thomas RE, Andrews LA, McBride HM, Whitworth AJ, Pallanck LJ. The  
487 PINK1/Parkin pathway regulates mitochondrial morphology. *Proceedings of the National Academy*  
488 *of Sciences of the United States of America*. 2008;105(5):1638-43.
- 489 19. Yang Y, Ouyang Y, Yang L, Beal MF, McQuibban A, Vogel H, et al. Pink1 regulates  
490 mitochondrial dynamics through interaction with the fission/fusion machinery. *Proc Natl Acad Sci*  
491 *USA*. 2008;105(19):7070-5.
- 492 20. Park J, Lee G, Chung J. The PINK1-Parkin pathway is involved in the regulation of  
493 mitochondrial remodeling process. *Biochem Biophys Res Commun*. 2009;378(3):518-23.
- 494 21. Burman JL, Yu S, Poole AC, Decal RB, Pallanck L. Analysis of neural subtypes reveals  
495 selective mitochondrial dysfunction in dopaminergic neurons from parkin mutants. *Proceedings of*  
496 *the National Academy of Sciences of the United States of America*. 2012;109(26):10438-43.
- 497 22. Vilain S, Esposito G, Haddad D, Schaap O, Dobрева MP, Vos M, et al. The yeast complex I  
498 equivalent NADH dehydrogenase rescues pink1 mutants. *PLoS genetics*. 2012;8(1):e1002456.

- 499 23. Fernandes C, Rao Y. Genome-wide screen for modifiers of Parkinson's disease genes in  
500 *Drosophila*. *Mol Brain*. 2011;4:17.
- 501 24. Pogson JH, Ivatt RM, Sanchez-Martinez A, Tufi R, Wilson E, Mortiboys H, et al. The Complex  
502 I Subunit NDUFA10 Selectively Rescues *Drosophila pink1* Mutants through a Mechanism  
503 Independent of Mitophagy. *PLoS genetics*. 2014;10(11):e1004815.
- 504 25. Giansanti MG, Belloni G, Gatti M. Rab11 is required for membrane trafficking and actomyosin  
505 ring constriction in meiotic cytokinesis of *Drosophila* males. *Mol Biol Cell*. 2007;18(12):5034-47.
- 506 26. Giansanti MG, Farkas RM, Bonaccorsi S, Lindsley DL, Wakimoto BT, Fuller MT, et al.  
507 Genetic dissection of meiotic cytokinesis in *Drosophila* males. *Mol Biol Cell*. 2004;15(5):2509-22.
- 508 27. Brill JA, Hime GR, Scharer-Schuksz M, Fuller MT. A phospholipid kinase regulates actin  
509 organization and intercellular bridge formation during germline cytokinesis. *Development*.  
510 2000;127(17):3855-64.
- 511 28. Plevoy G, Wei HC, Wong R, Szentpetery Z, Kim YJ, Goldbach P, et al. Dual roles for the  
512 *Drosophila* PI 4-kinase four wheel drive in localizing Rab11 during cytokinesis. *J Cell Biol*.  
513 2009;187(6):847-58.
- 514 29. Clark IE, Dodson MW, Jiang C, Cao JH, Huh JR, Seol JH, et al. *Drosophila pink1* is required  
515 for mitochondrial function and interacts genetically with parkin. *Nature*. 2006;441(7097):1162-6.
- 516 30. Perkins LA, Holderbaum L, Tao R, Hu Y, Sopko R, McCall K, et al. The Transgenic RNAi  
517 Project at Harvard Medical School: Resources and Validation. *Genetics*. 2015;201(3):843-52.
- 518 31. Godi A, Pertile P, Meyers R, Marra P, Di Tullio G, Iurisci C, et al. ARF mediates recruitment  
519 of PtdIns-4-OH kinase-beta and stimulates synthesis of PtdIns(4,5)P<sub>2</sub> on the Golgi complex. *Nature*  
520 *cell biology*. 1999;1(5):280-7.
- 521 32. Di Paolo G, De Camilli P. Phosphoinositides in cell regulation and membrane dynamics.  
522 *Nature*. 2006;443(7112):651-7.
- 523 33. Nagashima S, Tabara LC, Tilokani L, Paupe V, Anand H, Pogson JH, et al. Golgi-derived  
524 PI(4)P-containing vesicles drive late steps of mitochondrial division. *Science (New York, NY)*.  
525 2020;367(6484):1366-71.

- 526 34. Vincow ES, Thomas RE, Merrihew GE, Shulman NJ, Bammler TK, MacDonald JW, et al.  
527 Autophagy accounts for approximately one-third of mitochondrial protein turnover and is protein  
528 selective. *Autophagy*. 2019;15(9):1592-605.
- 529 35. Vincow ES, Merrihew G, Thomas RE, Shulman NJ, Beyer RP, MacCoss MJ, et al. The  
530 PINK1-Parkin pathway promotes both mitophagy and selective respiratory chain turnover in vivo.  
531 *Proceedings of the National Academy of Sciences of the United States of America*.  
532 2013;110(16):6400-5.
- 533 36. McWilliams TG, Prescott AR, Montava-Garriga L, Ball G, Singh F, Barini E, et al. Basal  
534 Mitophagy Occurs Independently of PINK1 in Mouse Tissues of High Metabolic Demand. *Cell*  
535 *metabolism*. 2018;27(2):439-49 e5.
- 536 37. Lee JJ, Sanchez-Martinez A, Zarate AM, Beninca C, Mayor U, Clague MJ, et al. Basal  
537 mitophagy is widespread in *Drosophila* but minimally affected by loss of Pink1 or parkin. *J Cell Biol*.  
538 2018;217(5):1613-22.
- 539 38. Whitworth AJ, Pallanck LJ. PINK1/Parkin mitophagy and neurodegeneration-what do we  
540 really know in vivo? *Curr Opin Genet Dev*. 2017;44:47-53.
- 541 39. Kim YY, Um JH, Yoon JH, Kim H, Lee DY, Lee YJ, et al. Assessment of mitophagy in mt-  
542 Keima *Drosophila* revealed an essential role of the PINK1-Parkin pathway in mitophagy induction in  
543 vivo. *FASEB J*. 2019;33(9):9742-51.
- 544 40. Cornelissen T, Vilain S, Vints K, Gounko N, Verstreken P, Vandenberghe W. Deficiency of  
545 parkin and PINK1 impairs age-dependent mitophagy in *Drosophila*. *Elife*. 2018;7.
- 546 41. Sandoval H, Yao CK, Chen K, Jaiswal M, Donti T, Lin YQ, et al. Mitochondrial fusion but not  
547 fission regulates larval growth and synaptic development through steroid hormone production. *Elife*.  
548 2014;3.
- 549

**Supplementary Table 1.** Details of full genotypes used in this study. More details of each line can be found in Methods.

| <b>Figure 1</b>               |                                                       |
|-------------------------------|-------------------------------------------------------|
| <b><u>Label</u></b>           | <b><u>Genotype</u></b>                                |
| <b>A</b>                      |                                                       |
| Control                       | da-GAL4/+                                             |
| fwd <sup>3</sup>              | fwd <sup>3</sup> /Df(3L)7C, da-GAL4                   |
| fwd <sup>3</sup> + fwd O/E    | UAS-GFP-fwd/+; fwd <sup>3</sup> /Df(3L)7C, da-GAL4    |
| fwd <sup>neo1</sup>           | fwd <sup>neo1</sup> /Df(3L)7C, da-GAL4                |
| fwd <sup>neo1</sup> + fwd O/E | UAS-GFP-fwd/+; fwd <sup>neo1</sup> /Df(3L)7C, da-GAL4 |
| <b>B</b>                      |                                                       |
| Control                       | da-GAL4/+                                             |
| fwd <sup>3</sup>              | fwd <sup>3</sup> /Df(3L)7C, da-GAL4                   |
| <b>C</b>                      |                                                       |
| Control                       | da-GAL4/+                                             |
| fwd <sup>3</sup>              | fwd <sup>3</sup> /Df(3L)7C                            |
| <b>D</b>                      |                                                       |
| <u>Ubiquitous:</u>            |                                                       |
| control-RNAi                  | da-GAL4/UAS-Luciferase-RNAi                           |
| fwd-RNAi                      | da-GAL4/UAS-fwd-RNAi                                  |
| <u>Neuronal:</u>              |                                                       |
| control-RNAi                  | nSyb-GAL4/UAS-Luciferase-RNAi                         |
| fwd-RNAi                      | nSyb-GAL4/UAS-fwd-RNAi                                |
| <u>Muscle:</u>                |                                                       |
| control-RNAi                  | Mef2-GAL4/UAS-Luciferase-RNAi                         |
| fwd-RNAi                      | Mef2-GAL4/UAS-fwd-RNAi                                |



| <b>Figure 2</b>  |                                                                       |
|------------------|-----------------------------------------------------------------------|
| <u>Label</u>     | <u>Genotype</u>                                                       |
| <b>A</b>         |                                                                       |
| Control          | UAS-mito-HA-GFP/+; da-GAL4/+                                          |
| fwd <sup>3</sup> | UAS-mito-HA-GFP/+; fwd <sup>3</sup> /Df(3L)7C, da-GAL4                |
| <b>B</b>         |                                                                       |
| Control          | da-GAL4/+                                                             |
| fwd <sup>3</sup> | fwd <sup>3</sup> /Df(3L)7C, da-GAL4                                   |
| <b>C-F</b>       |                                                                       |
| Control          | CCAP-GAL4,UAS-mito-Tomato/ UAS-mito-HA-GFP; fwd <sup>3</sup> /+       |
| fwd <sup>3</sup> | CCAP-GAL4,UAS-mito-Tomato/UAS-mito-HA-GFP; fwd <sup>3</sup> /Df(3L)7C |

| <b>Figure 3</b>  |                                     |
|------------------|-------------------------------------|
| <u>Label</u>     | <u>Genotype</u>                     |
| <b>A, B</b>      |                                     |
| Control          | da-GAL4/+                           |
| fwd <sup>3</sup> | fwd <sup>3</sup> /Df(3L)7C, da-GAL4 |

| <b>Figure 4</b>                           |                                                                 |
|-------------------------------------------|-----------------------------------------------------------------|
| <u>Label</u>                              | <u>Genotype</u>                                                 |
| <b>A</b>                                  |                                                                 |
| Control                                   | da-GAL4/UAS-mito-HA-GFP                                         |
| fwd <sup>RNAi</sup>                       | da-GAL4/UAS-fwd-RNAi                                            |
| Marf <sup>-/+</sup>                       | Marf <sup>B</sup> /w <sup>1118</sup> ; da-GAL4/ UAS-mito-HA-GFP |
| Marf <sup>-/+</sup> ; fwd <sup>RNAi</sup> | Marf <sup>B</sup> / w <sup>1118</sup> ; da-GAL4/UAS-fwd-RNAi    |

| <b>B</b>                                                |                                                                                                |
|---------------------------------------------------------|------------------------------------------------------------------------------------------------|
| Control                                                 | da-GAL4/ UAS-mito-HA-GFP                                                                       |
| <i>fwd</i> <sup>RNAi</sup>                              | da-GAL4/UAS- <i>fwd</i> -RNAi                                                                  |
| <i>Opa1</i> <sup>-/+</sup>                              | <i>Opa1</i> <sup>s3475/+</sup> ; da-GAL4/UAS-mito-HA-GFP                                       |
| <i>Opa1</i> <sup>-/+</sup> ; <i>fwd</i> <sup>RNAi</sup> | <i>Opa1</i> <sup>s3475/+</sup> ; da-GAL4/UAS- <i>fwd</i> -RNAi                                 |
| <b>C</b>                                                |                                                                                                |
| Control                                                 | da-GAL4/+                                                                                      |
| <i>fwd</i> <sup>RNAi</sup>                              | UAS-mito-HA-GFP/+; da-GAL4/UAS- <i>fwd</i> -RNAi                                               |
| Drp1 O/E                                                | UAS-mito-HA-GFP/+; da-GAL4/UAS-Drp1                                                            |
| Drp1 O/E + <i>fwd</i> <sup>RNAi</sup>                   | da-GAL4/UAS- <i>fwd</i> -RNAi, UAS-Drp1                                                        |
| <b>D</b>                                                |                                                                                                |
| Control                                                 | UAS-mito-HA-GFP/+; CCAP-GAL4/+                                                                 |
| <i>fwd</i> <sup>RNAi</sup>                              | UAS-mito-HA-GFP/+; CCAP-GAL4/UAS- <i>fwd</i> -RNAi                                             |
| <i>Marf</i> <sup>-/+</sup> , <i>fwd</i> <sup>RNAi</sup> | <i>Marf</i> <sup>B/w<sup>1118</sup></sup> ; UAS-mito-HA-GFP/+; CCAP-GAL4/UAS- <i>fwd</i> -RNAi |
| <i>Opa1</i> <sup>-/+</sup> , <i>fwd</i> <sup>RNAi</sup> | UAS-mito-HA-GFP/ <i>Opa1</i> <sup>s3475</sup> ; CCAP-GAL4/UAS- <i>fwd</i> -RNAi                |
| Drp1 O/E + <i>fwd</i> <sup>RNAi</sup>                   | UAS-mito-HA-GFP/+; CCAP-GAL4/UAS- <i>fwd</i> -RNAi, UAS-Drp1                                   |

| <b>Figure 5</b>                             |                                                                                         |
|---------------------------------------------|-----------------------------------------------------------------------------------------|
| <u>Label</u>                                | <u>Genotype</u>                                                                         |
| <b>A, C</b>                                 |                                                                                         |
| Control                                     | da-GAL4/+                                                                               |
| <i>fwd</i> O/E                              | UAS-GFP- <i>fwd</i> /+; da-GAL4/+                                                       |
| <i>park</i> <sup>-/-</sup>                  | <i>park</i> <sup>25</sup> / <i>park</i> <sup>25</sup> , da-GAL4                         |
| <i>park</i> <sup>-/-</sup> , <i>fwd</i> O/E | UAS-GFP- <i>fwd</i> /+; <i>park</i> <sup>25</sup> / <i>park</i> <sup>25</sup> , da-GAL4 |

| <b>B, C</b>                   |                                                                    |
|-------------------------------|--------------------------------------------------------------------|
| Control                       | da-GAL4/+                                                          |
| fwd O/E                       | UAS-GFP-fwd/+; da-GAL4/+                                           |
| Pink1 <sup>-</sup>            | Pink1 <sup>B9</sup> /Y; da-GAL4/+                                  |
| Pink1 <sup>-</sup> , fwd O/E  | Pink1 <sup>B9</sup> /Y; UAS-GFP-fwd/+; da-GAL4/+                   |
| <b>D</b>                      |                                                                    |
| Control                       | UAS-mito-HA-GFP/+; Mef2-GAL4/+                                     |
| Pink1 <sup>-</sup>            | Pink1 <sup>B9</sup> /Y; UAS-mito-HA-GFP/+; Mef2-GAL4/+             |
| Pink1 <sup>-</sup> , fwd O/E  | Pink1 <sup>B9</sup> /Y; UAS-GFP-fwd/+; Mef2-GAL4/+                 |
| park <sup>-/-</sup>           | park <sup>25</sup> / park <sup>25</sup> , Mef2-GAL4                |
| park <sup>-/-</sup> , fwd O/E | UAS-GFP-fwd/+; park <sup>25</sup> / park <sup>25</sup> , Mef2-GAL4 |

| <b>Figure 6</b>                                      |                                                                               |
|------------------------------------------------------|-------------------------------------------------------------------------------|
| <u>Label</u>                                         | <u>Genotype</u>                                                               |
| <b>A, C</b>                                          |                                                                               |
| Control                                              | UAS-mito-HA-GFP /+; da-GAL4/+                                                 |
| Pink1 <sup>-</sup>                                   | Pink1 <sup>B9</sup> /Y; UAS-mito-HA-GFP/+; da-GAL4/+                          |
| Pink1 <sup>-</sup> , Drp1 O/E                        | Pink1 <sup>B9</sup> /Y; UAS-mito-HA-GFP/+; da-GAL4/UAS-Drp1                   |
| Pink1 <sup>-</sup> , Drp1 O/E + fwd <sup>RNAi</sup>  | Pink1 <sup>B9</sup> /Y; da-GAL4/UAS-fwd-RNAi, UAS-Drp1                        |
| <b>B, D</b>                                          |                                                                               |
| Control                                              | UAS-mito-HA-GFP /+; da-GAL4/+                                                 |
| park <sup>-/-</sup>                                  | park <sup>25</sup> /park <sup>25</sup> , da-GAL4                              |
| park <sup>-/-</sup> , Drp1 O/E                       | UAS-mito-HA-GFP/+; park <sup>25</sup> , UAS-Drp1/park <sup>25</sup> , da-GAL4 |
| park <sup>-/-</sup> , Drp1 O/E + fwd <sup>RNAi</sup> | UAS-fwd-RNAi, park <sup>25</sup> , UAS-Drp1/park <sup>25</sup> , da-GAL4      |

**A**

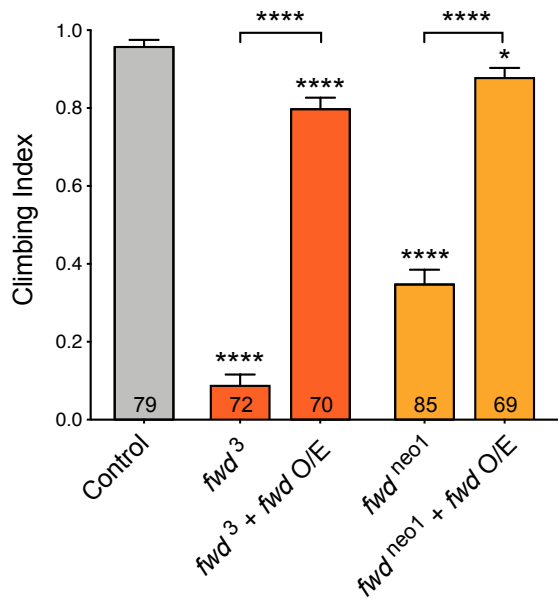

**B**

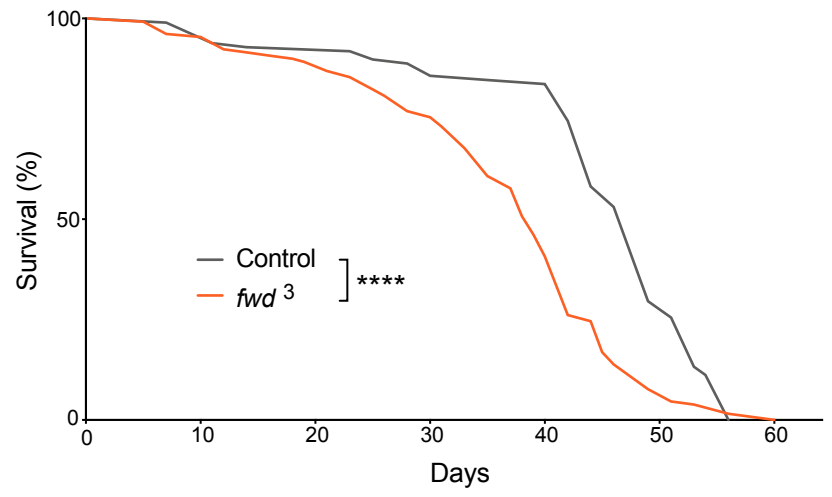

**C**

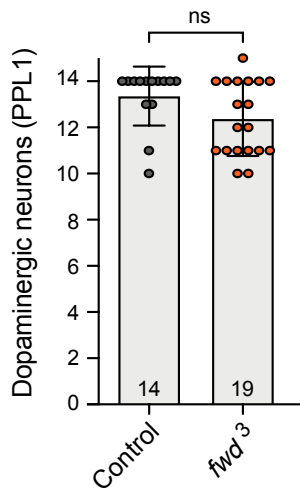

**D**

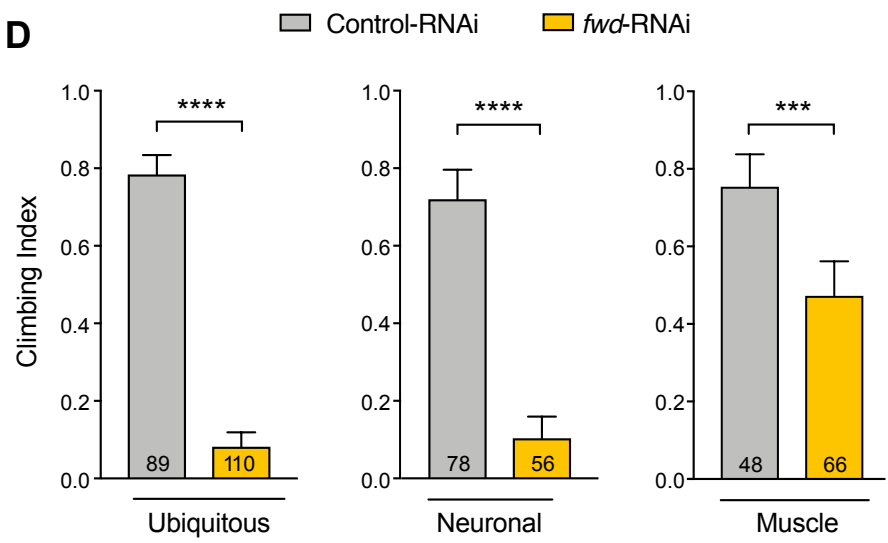

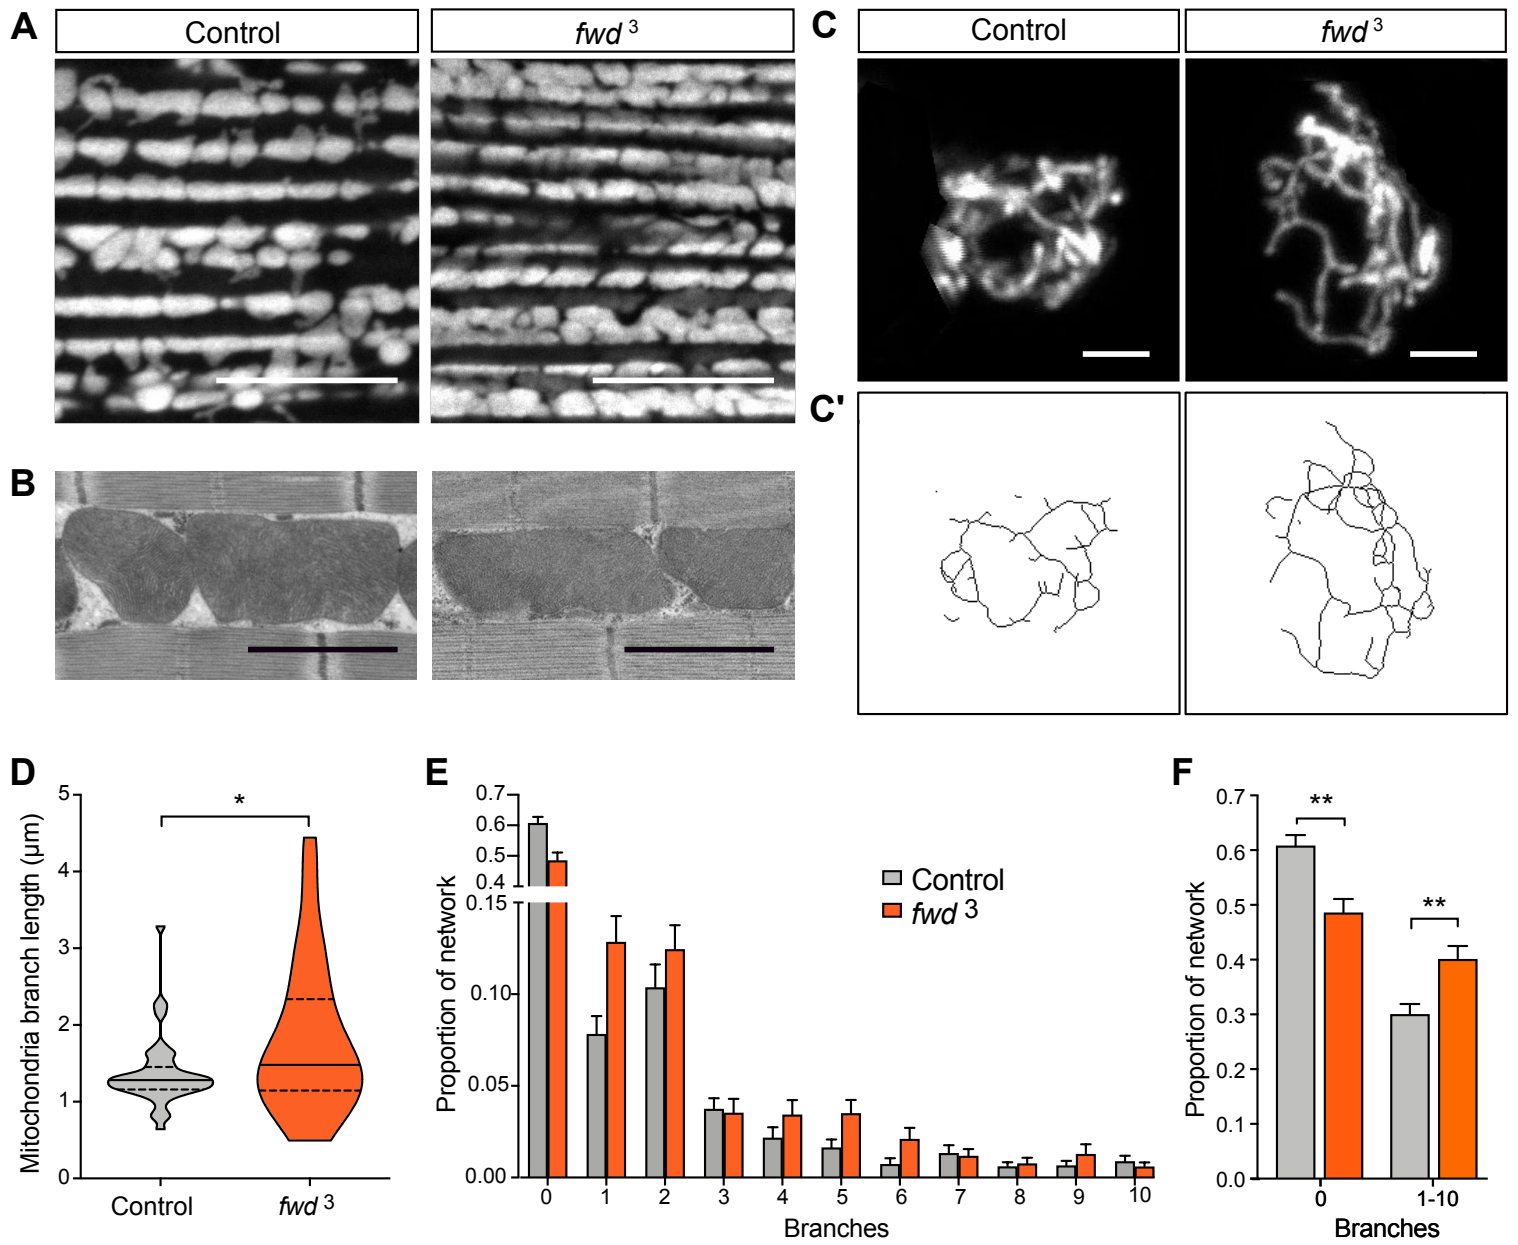

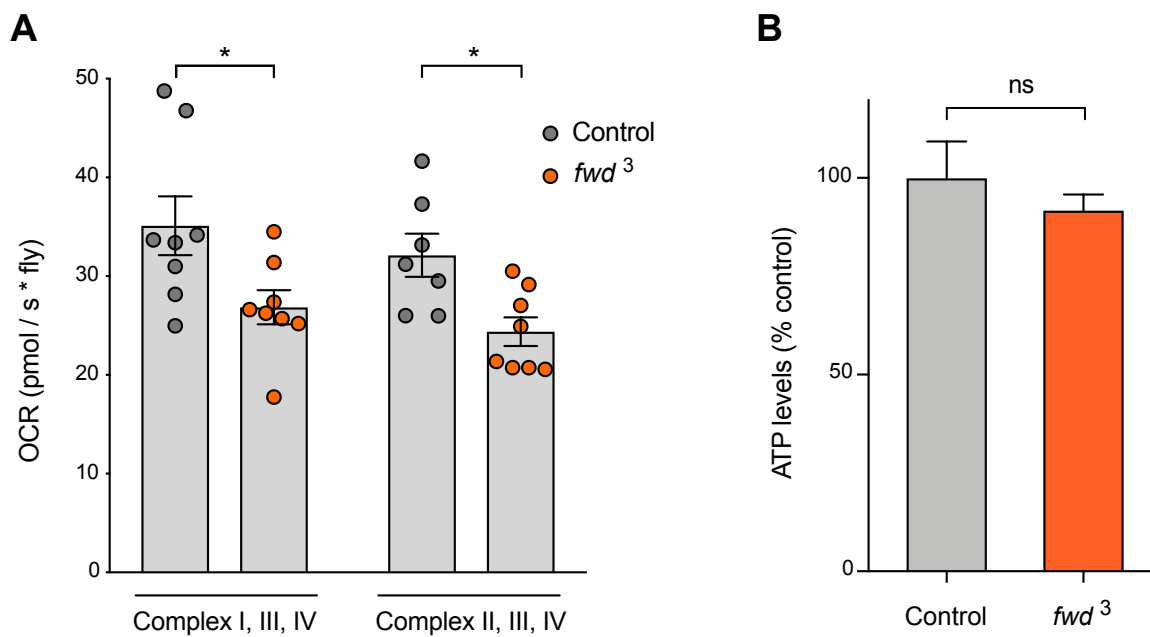

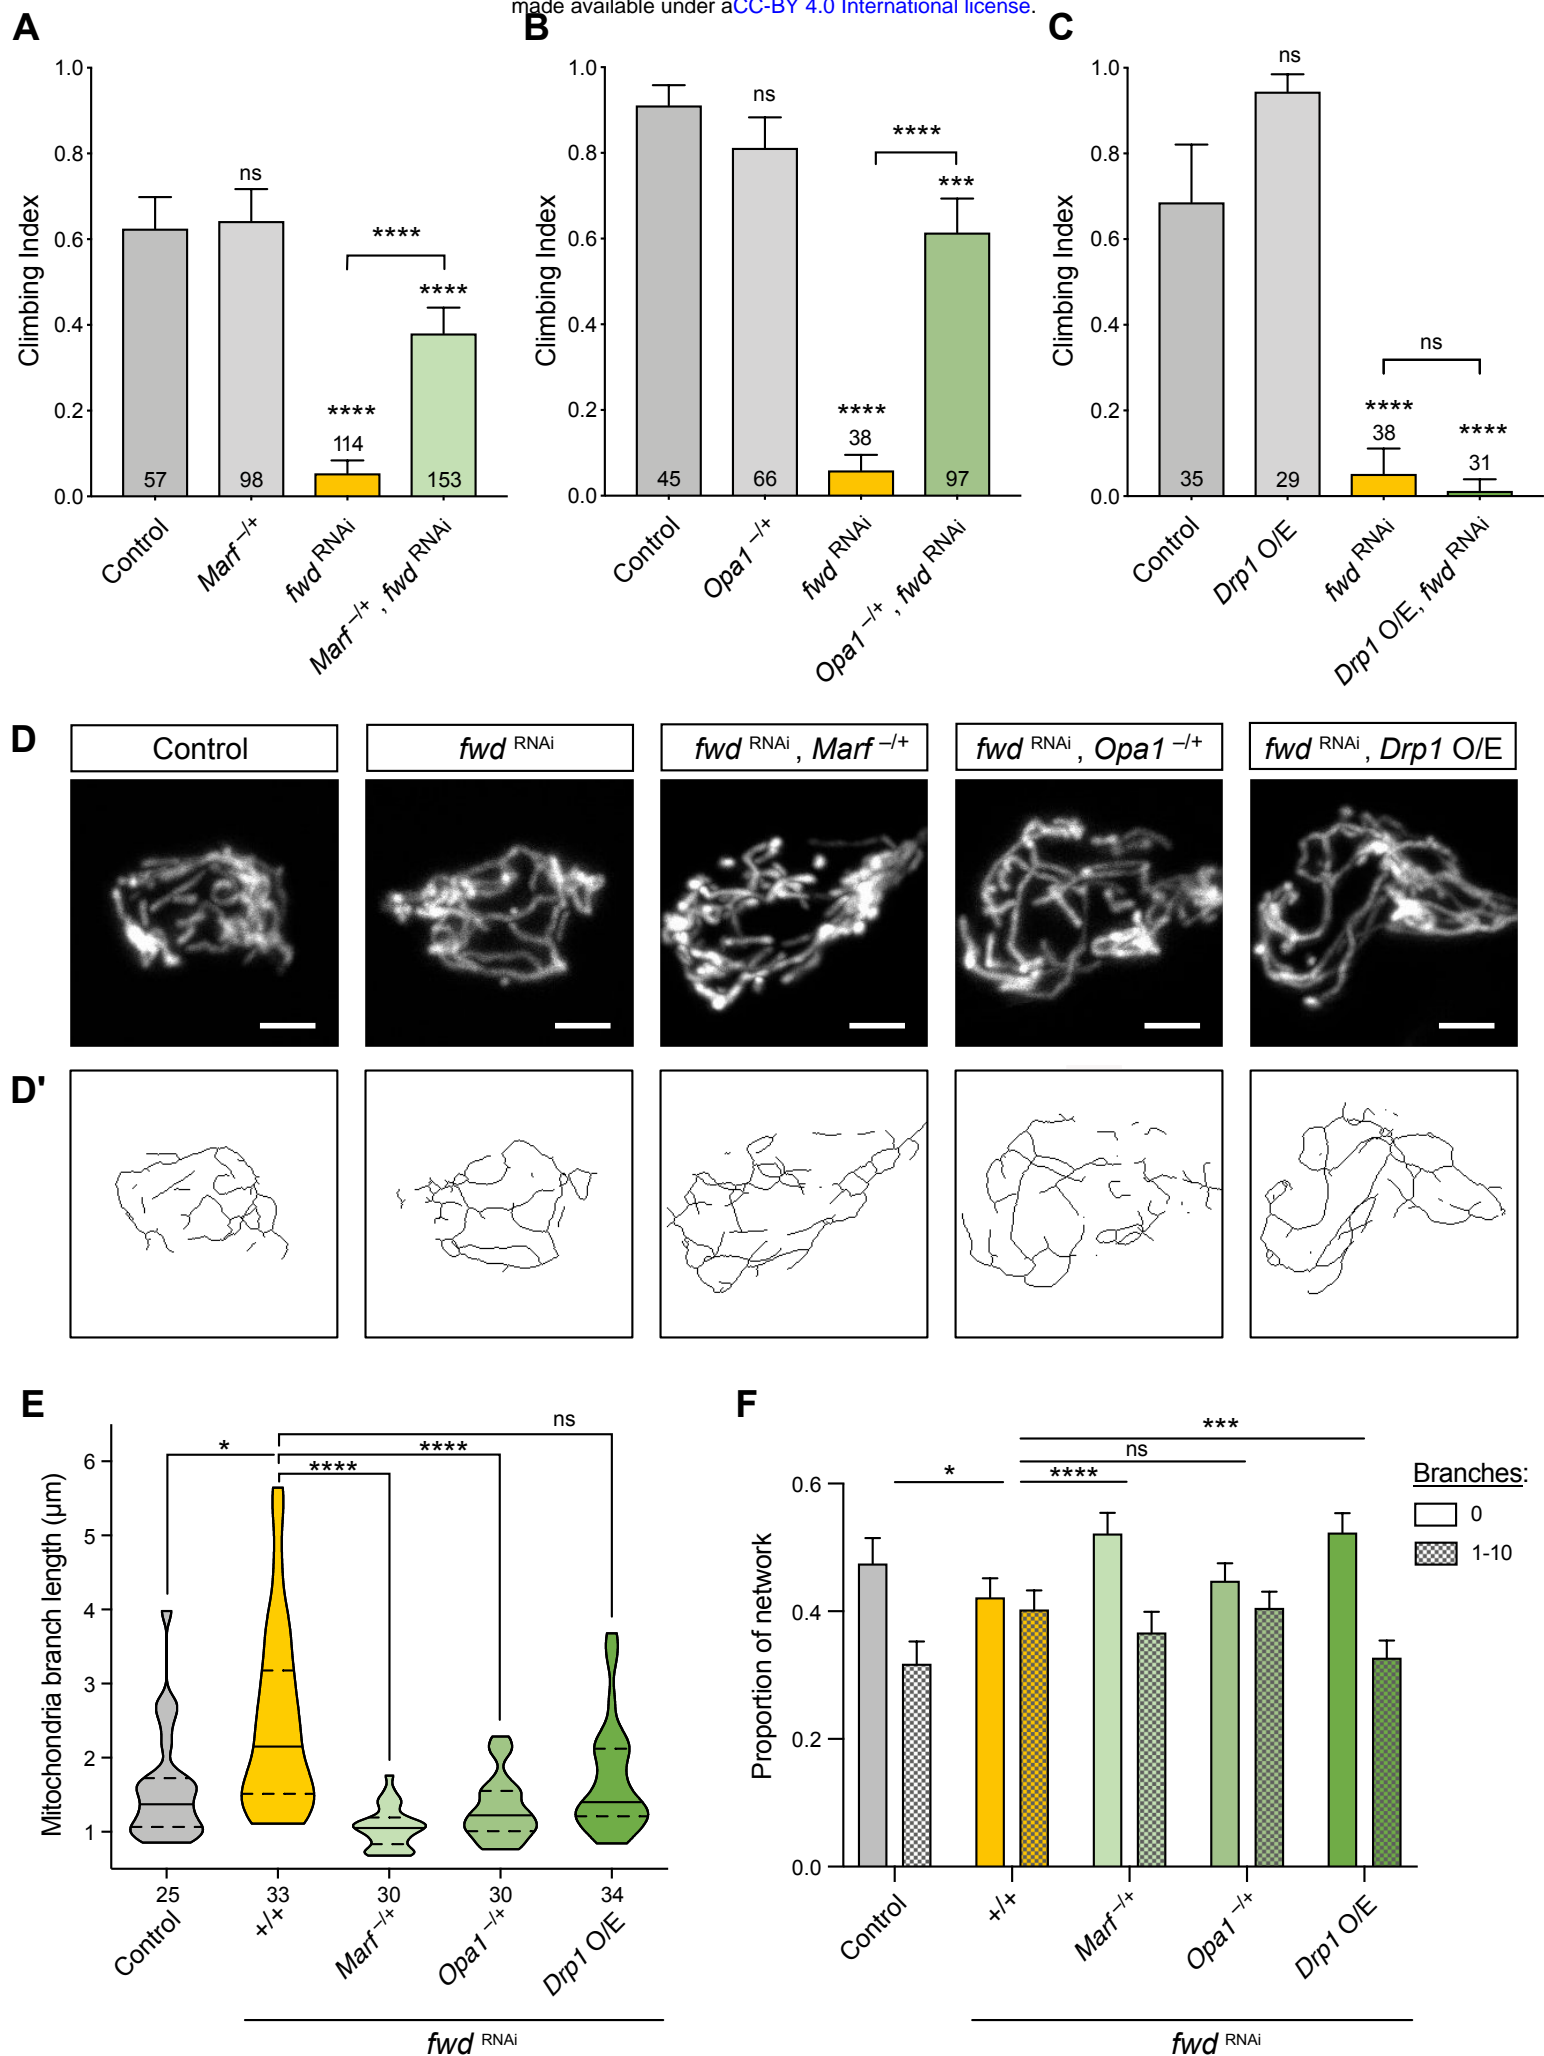



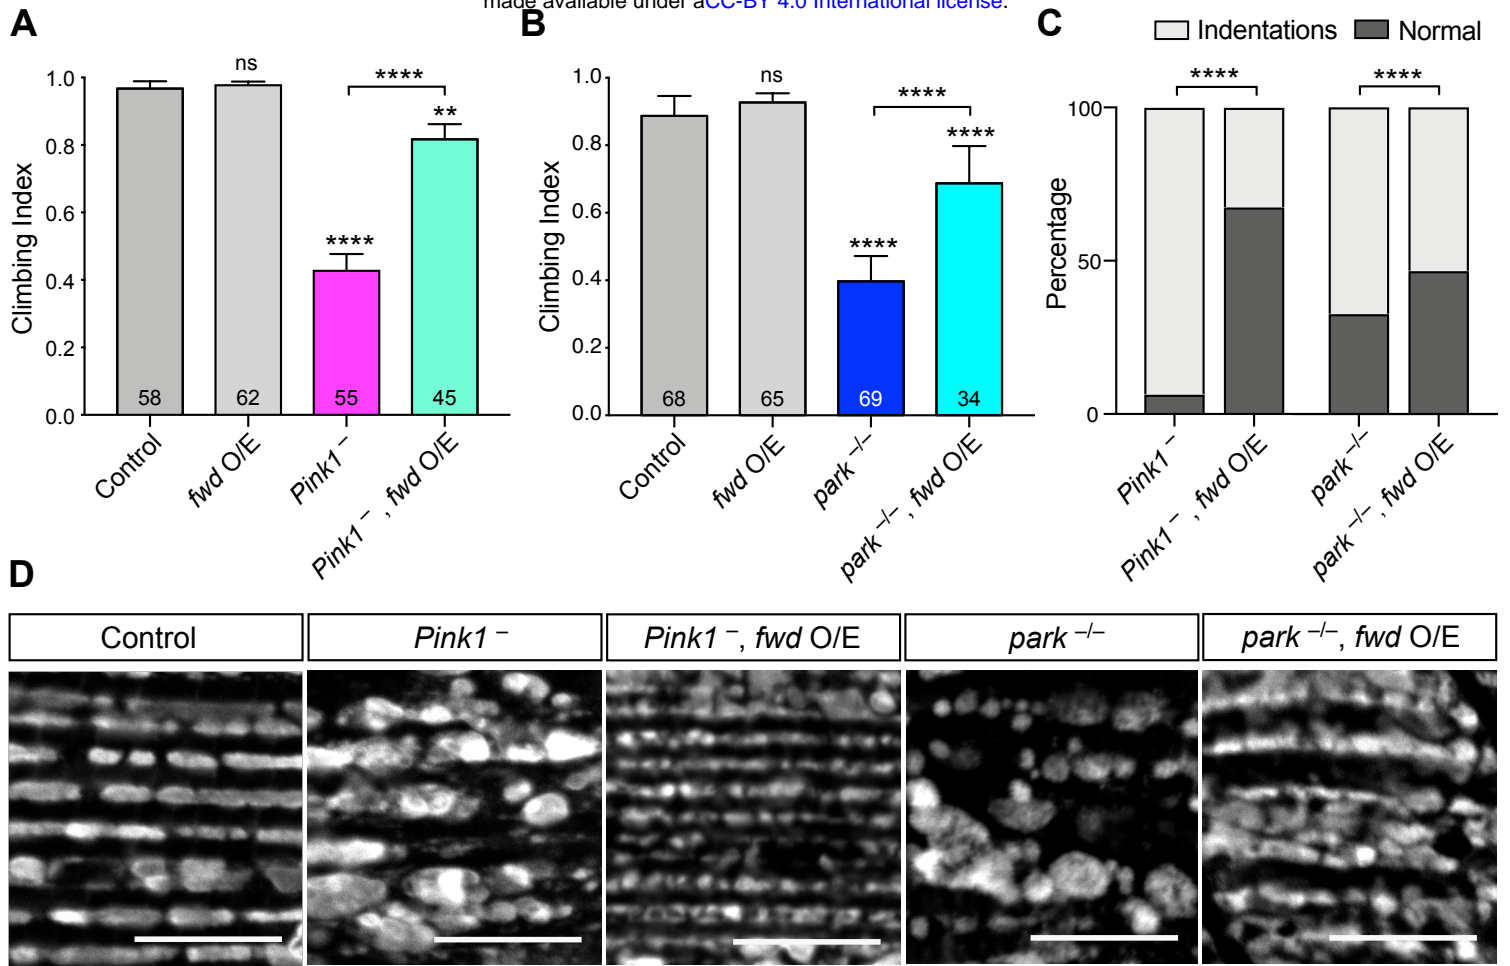

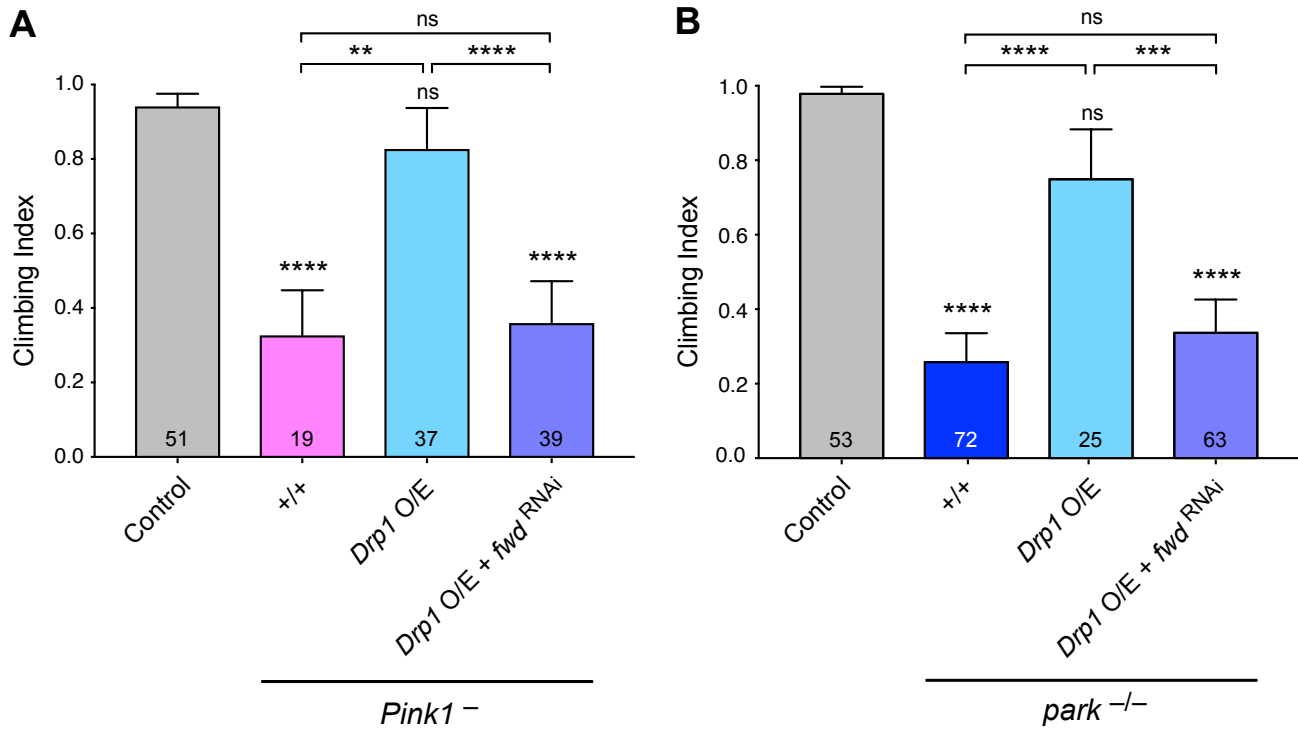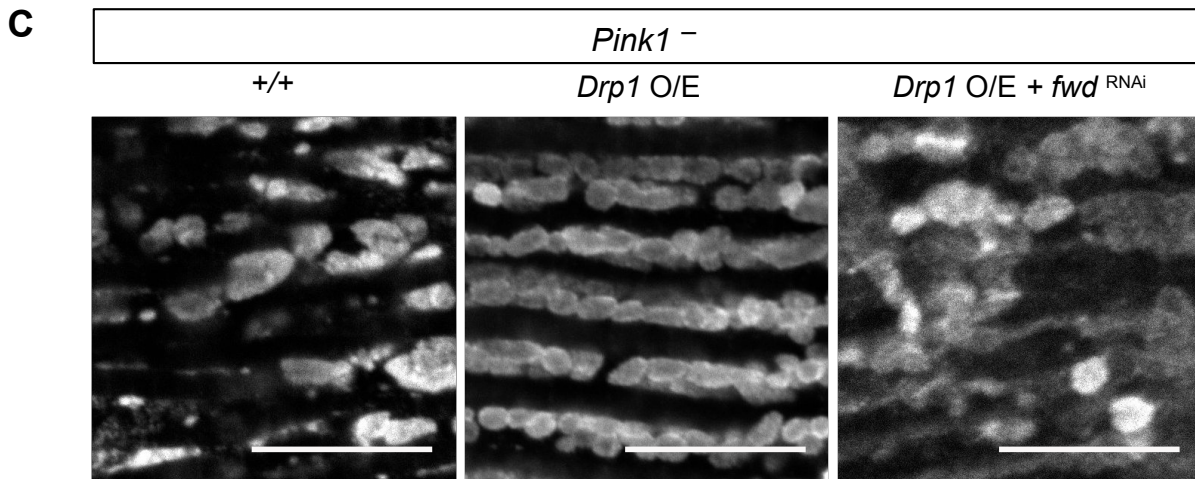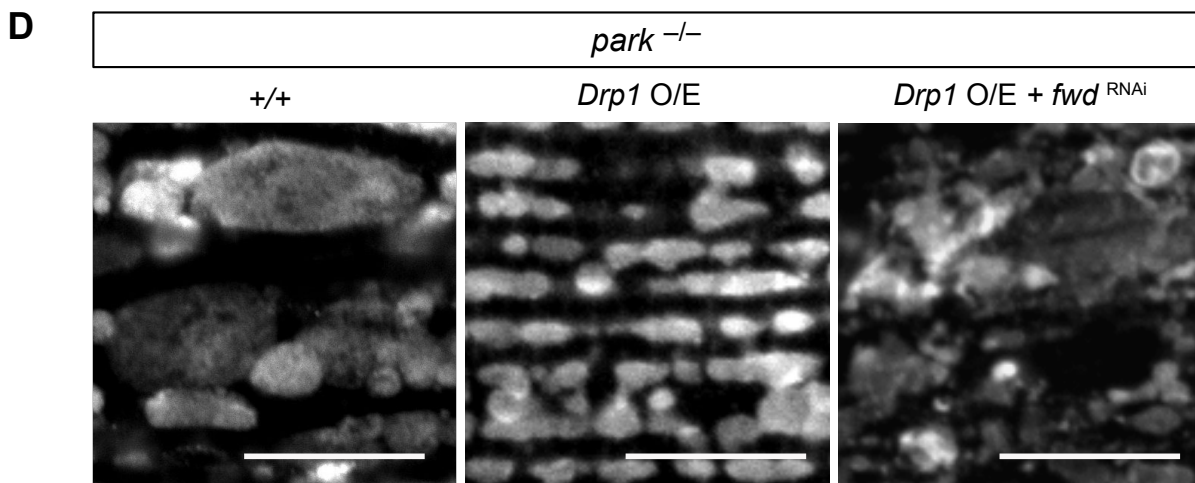

Source: https://biorxiv.org/content/10.1101/2020.05.13.093823v1.full.pdf
